# Supplementary material for: Identification of Two Heritable Cross-Disorder Endophenotypes for Tourette Syndrome
Source: Atypon-hosted journal article supplement (doi:10.1176/appi.ajp.2016.16020240), 2016-11-04
Supplement: appi.ajp.2016.16020240.ds001.pdf [file appi.ajp.2016.16020240.ds001.pdf]

 


Psychiatry Online
